# Supplementary material
Source: publisher figshare collection journal article supplement (https://acs.figshare.com/ndownloader/files/26509682)
Supplement: Supplementary file 1 [file 26509682]

## **Supporting Information**

### **Nitrogen doped carbon derived from deep eutectic solvent as high performance supercapacitor**

Tao Wang, Jia Guo, Yao Guo, Jing Feng and Dongling Wu\*

*Key Laboratory of Energy Materials Chemistry, Ministry of Education; Key Laboratory of Advanced Functional Materials, Autonomous Region; Institute of Applied Chemistry, College of Chemistry, Xinjiang University, Urumqi, 830046, Xinjiang, PR China.*

---

\* Corresponding author.

E-mail: wudl@xju.edu.cn (D. Wu).

It can be seen that the chemical shift of the mixture (Figure S1c) was in between those of their individual components (L-tyrosine and urea, Figure S1a and b), suggesting the existence of weak interactions of hydrogen bonds between the individual components<sup>1</sup>. FT-IR spectra of tyrosine or urea and DESs are showed in Figure 1d. The peak at 3300-3500  $\text{cm}^{-1}$  is belong to the vibration absorption band of  $-\text{NH}_2$ . The peak at 1610  $\text{cm}^{-1}$  (N-H stretching vibration) appeared in urea, but the  $-\text{NH}$  stretching vibration shifts to lower wave number (red shift) in the DES (Figure S1d), which further indicating the forming of hydrogen bonding in DESs.<sup>2</sup>

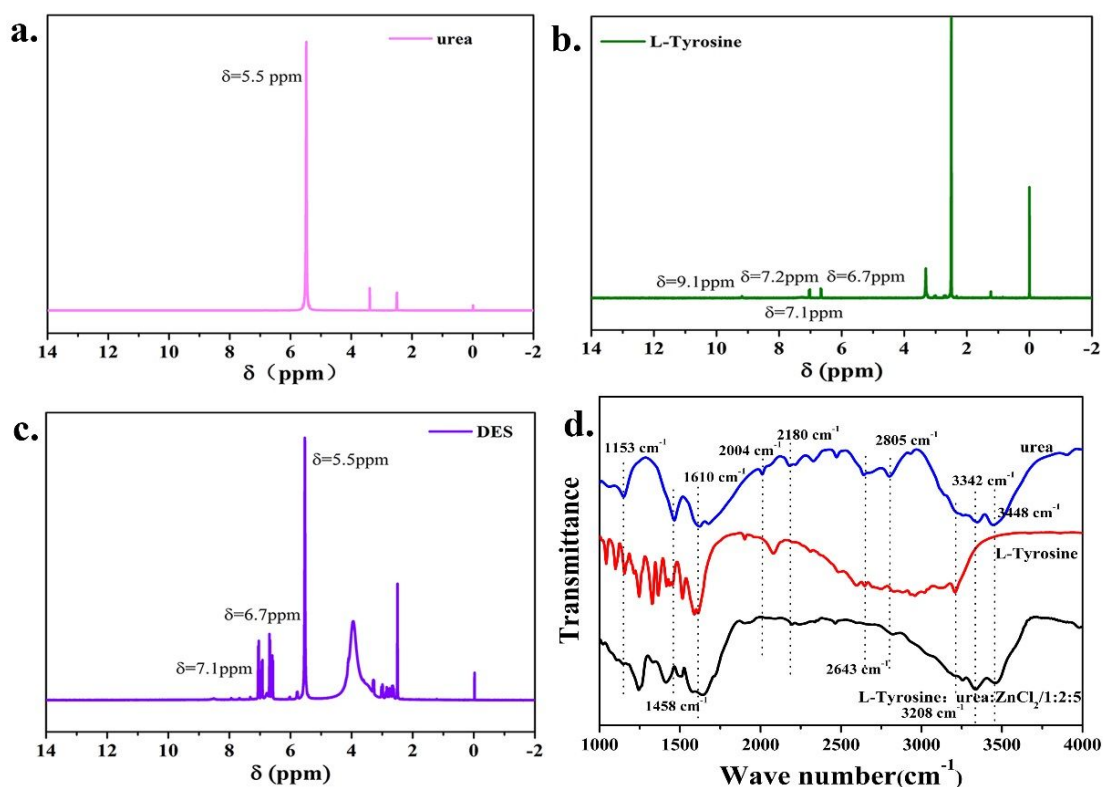

**Figure S1.** <sup>1</sup>H NMR spectra of (a) urea, (b) L-tyrosine and (c) DES; (d) FTIR spectra of DES.

**Table S1.** Different N functionalities ratio of NCs

| Samples | N content (%) |            |              |            |
|---------|---------------|------------|--------------|------------|
|         | Pyridinic-N   | Pyrrolic-N | Graphitic- N | Oxidized-N |
|         |               |            |              |            |

|               |      |      |      |      |
|---------------|------|------|------|------|
| NCs-800-2-5   | 25.6 | 48.3 | 19.9 | 6.2  |
| NCs-900-1-5   | 25.0 | 45.2 | 17.2 | 12.6 |
| NCs-900-2-10  | 31.5 | 39.4 | 15.0 | 14.1 |
| NCs-900-2-5   | 34.3 | 47.0 | 17.4 | 1.3  |
| NCs-900-2-2.5 | 28.3 | 54.4 | 17.3 | -    |
| NCs-900-3-5   | 25.4 | 39.0 | 22.4 | 13.2 |
| NCs-1000-2-5  | 25.8 | 48.5 | 22.2 | 3.5  |

**Table S2.** Comparison of the specific capacitance of some reported carbon materials with our prepared samples.

| Sample                | Current density<br>(A g <sup>-1</sup> ) | Capacitance<br>(F g <sup>-1</sup> ) | Electrolyte | Reference                                            |
|-----------------------|-----------------------------------------|-------------------------------------|-------------|------------------------------------------------------|
| JS-CK <sub>2</sub> NS | 1.0                                     | 262                                 | 6 M KOH     | Electrochim. Acta, 2020, 331,<br>135338-135348       |
| CNSs-3                | 0.5                                     | 283                                 | 6 M KOH     | ACS Appl. Mater. Interfaces,<br>2014, 6, 20795-20803 |
| N-PCs-700             | 1.0                                     | 255                                 | 2 M KOH     | Bioresource Technol., 2015,<br>197, 137-142          |
| NOCS-1/10             | 0.5                                     | 242                                 | 6 M KOH     | J. Mater. Chem. A, 2018, 6,<br>17730-17739           |
| PC <sub>4/1-C</sub>   | 0.05                                    | 245                                 | 6 M KOH     | Electrochim. Acta, 2013, 105,<br>635-641             |

|             |     |     |         |                                       |
|-------------|-----|-----|---------|---------------------------------------|
| N-CBDC-5    | 1.0 | 260 | 1 M KOH | Energy, 2019, 189, 116241-116248      |
| PFC-700     | 0.5 | 270 | 6 M KOH | J. Power Sources, 2017, 341, 309-317  |
| N-MCs       | 0.2 | 318 | 6 M KOH | Appl. Surf. Sci., 2017, 422, 654-660  |
| PCNS-600    | 1.0 | 306 | 6 M KOH | Nano Energy, 2018, 51, 366-372        |
| HPNCT-800   | 1.0 | 292 | 6 M KOH | J. Mater. Chem. A, 2016, 4, 1637-1646 |
| NCs-900-2-5 | 0.5 | 307 | 6 M KOH | This work                             |

---

## References

(1) Carriazo, D.; Serrano, M. C.; Gutierrez, M. C.; Ferrer, M. L.; del Monte, F. Deep-eutectic solvents playing multiple roles in the synthesis of polymers and related materials. *Chem. Soc. Rev.* **2012**, *41*, 4996-5014.

(2) Zhang, Q.; Vigier, K. D. O.; Royer, S.; Jérôme, F. Deep eutectic solvents: syntheses, properties and applications. *Chem. Soc. Rev.* **2012**, *41*, 7108-7146.
